# Supplementary material
Source: MDPI journal article supplement (https://www.mdpi.com/2071-1050/13/22/12840)
Supplement: s1 [file s1 › Supplementary Table S1.pdf]

## Supplementary

**Table S1. Microplastic concentration found in participants' stool samples.**

| Participant       | HDPE         | LDPE | PE | PP           | PS          | PET         |
|-------------------|--------------|------|----|--------------|-------------|-------------|
| H1                | nd           | nd   | nd | nd           | nd          | 6,94 ± 2,56 |
| H2                | nd           | nd   | nd | 3,95 ± 2,05  | 4,82 ± 1,41 | nd          |
| H3                | 13,77 ± 5,71 | nd   | nd | nd           | 2,65 ± 1,28 | nd          |
| H4                | 0,52 ± 0,17  | nd   | nd | 7,86 ± 1,28  | nd          | nd          |
| H5                | nd           | nd   | nd | nd           | nd          | nd          |
| H6                | nd           | nd   | nd | nd           | nd          | nd          |
| H7                | nd           | nd   | nd | 12,40 ± 3,44 | nd          | nd          |
| H8                | nd           | nd   | nd | 16,55 ± 5,96 | nd          | nd          |
| H9                | nd           | nd   | nd | nd           | nd          | nd          |
| H10               | nd           | nd   | nd | nd           | nd          | nd          |
| H11               | 15,62 ± 2,78 | nd   | nd | nd           | nd          | nd          |
| <b>Average</b>    | 9,97         | -    | -  | 10,19        | 3,735       | 6,94        |
| <b>Prevalence</b> | 0,273        | 0    | 0  | 0,364        | 0,273       | 0,091       |

nd: not detected
