# Supplementary material
Source: MDPI journal article supplement (https://www.mdpi.com/2071-1050/13/22/12840)
Supplement: s1 [file s1 › Supplementary Table S2.pdf]

## Supplementary

**Table S2. Summary of data collected from interview with participants and the total of microplastics found in each stool sample.**

| Population                                         | Code | Gender | Age | Frequency of seafood consumption* | Frequency of consuming food with plastic packaging* | Mean of total microplastics found in fecal sample (µg/g) |
|----------------------------------------------------|------|--------|-----|-----------------------------------|-----------------------------------------------------|----------------------------------------------------------|
| <b>Pacet</b>                                       | H1   | Male   | 30  | 1                                 | 7                                                   | 6,9366                                                   |
|                                                    | H2   | Female | 46  | 4                                 | 5                                                   | 8,77548                                                  |
|                                                    | H3   | Male   | 38  | 0                                 | 11                                                  | 16,42706                                                 |
|                                                    | H4   | Male   | 45  | 4                                 | 11                                                  | 8,3804                                                   |
|                                                    | H5   | Female | 48  | 0                                 | 8                                                   | 0                                                        |
|                                                    | H6   | Female | 42  | 4                                 | 14                                                  | 0                                                        |
|                                                    | H7   | Female | 28  | 0                                 | 16                                                  | 12,4025                                                  |
|                                                    | H8   | Female | 46  | 5                                 | 2                                                   | 16,5452                                                  |
|                                                    | H9   | Male   | 31  | 1                                 | 10                                                  | 0                                                        |
|                                                    | H10  | Male   | 49  | 3                                 | 7                                                   | 0                                                        |
|                                                    | H11  | Female | 30  | 6                                 | 4                                                   | 15,61686                                                 |
| <b>Pearson correlation with total micrplastics</b> |      |        |     | 0.232; p-value=0.493              | -0.257; p-value=0.446                               |                                                          |

\* the data were collected daily for 1 week before stool samples collection
